# Supplementary material
Source: MDPI journal article supplement (https://www.mdpi.com/2073-445X/10/3/240)
Supplement: s1 [file s1]

Supporting Information for

## **To mitigate or adapt? Explaining why citizens responding to climate change favour the former**

Authors: Kristina Blennow <sup>1,\*</sup> and Johannes Persson <sup>2</sup>

<sup>1</sup> Department of Landscape architecture, Planning and Management, SLU Alnarp, Swedish University of Agricultural Sciences

<sup>2</sup> Department of Philosophy, Lund University

\* Correspondence: Kristina.Blennow@slu.se

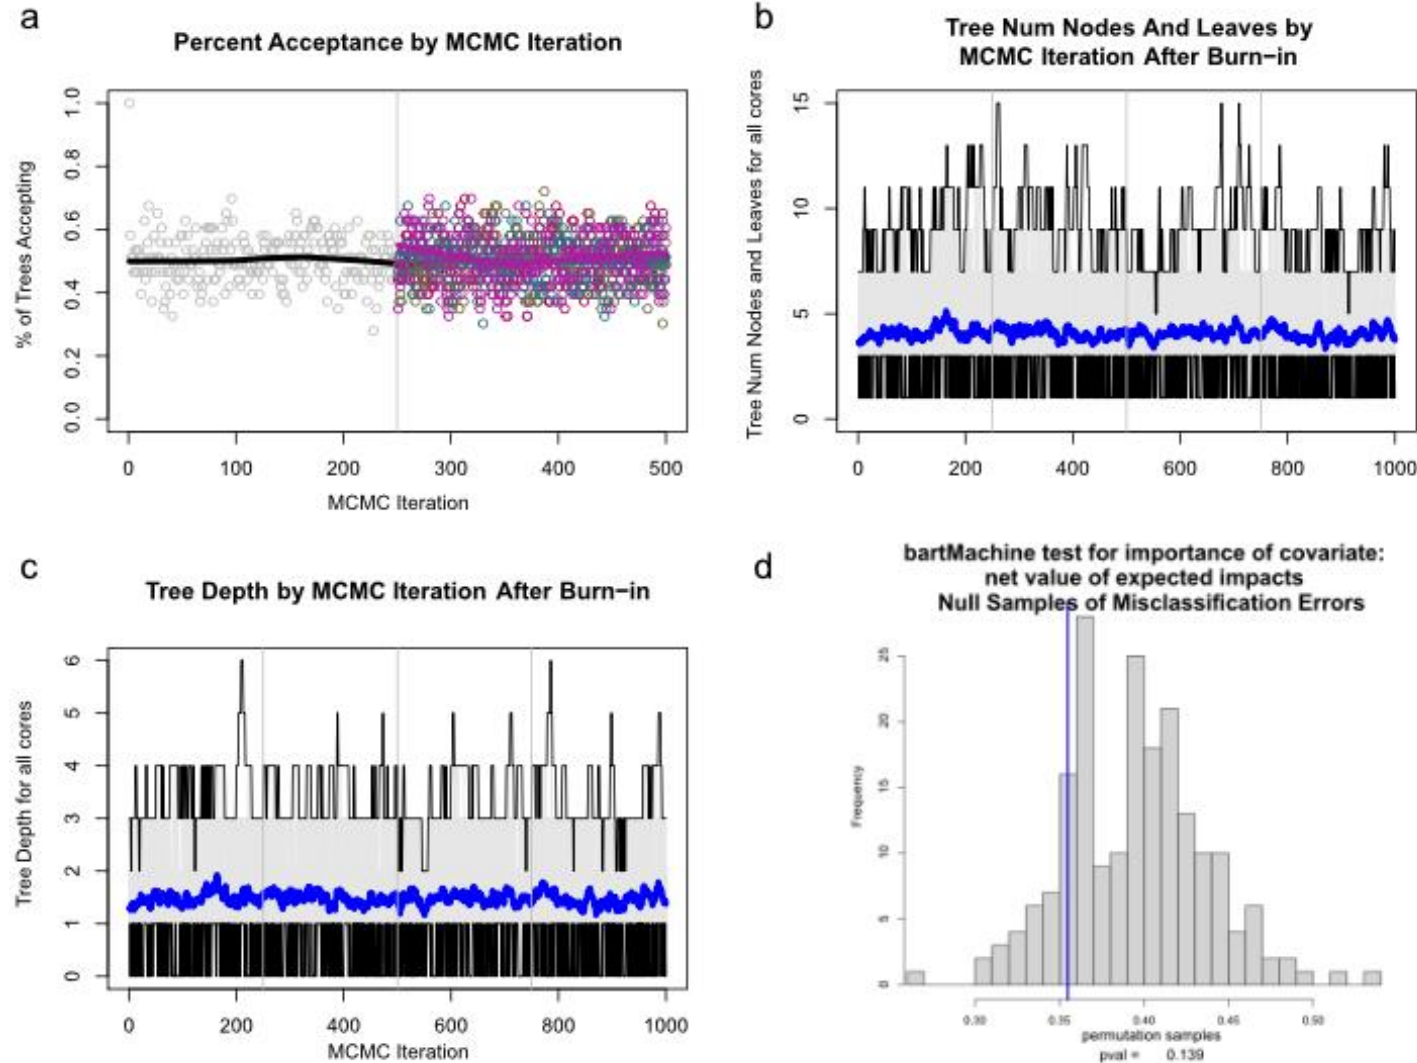

**Figure S1.** Convergence diagnostics and test of covariate importance for a BART model of the probability of having decided in favour of adaptation (taken as the equivalent of the expected utility value of adaptation). Per cent Metropolis-Hastings proposals accepted across the 43 trees with one point per iteration (a); average number of leaves across the trees by iteration (b); average tree depth across the trees used by iteration (c); test results for the importance of the covariate net value of expected impacts (d). The grey vertical line separates burn-in iterations and post-burn-in iterations and colours of dots illustrate the different computing cores used (a). The p-value is the fraction of permutation-sampled total misclassification errors less than the observed total misclassification error (d).

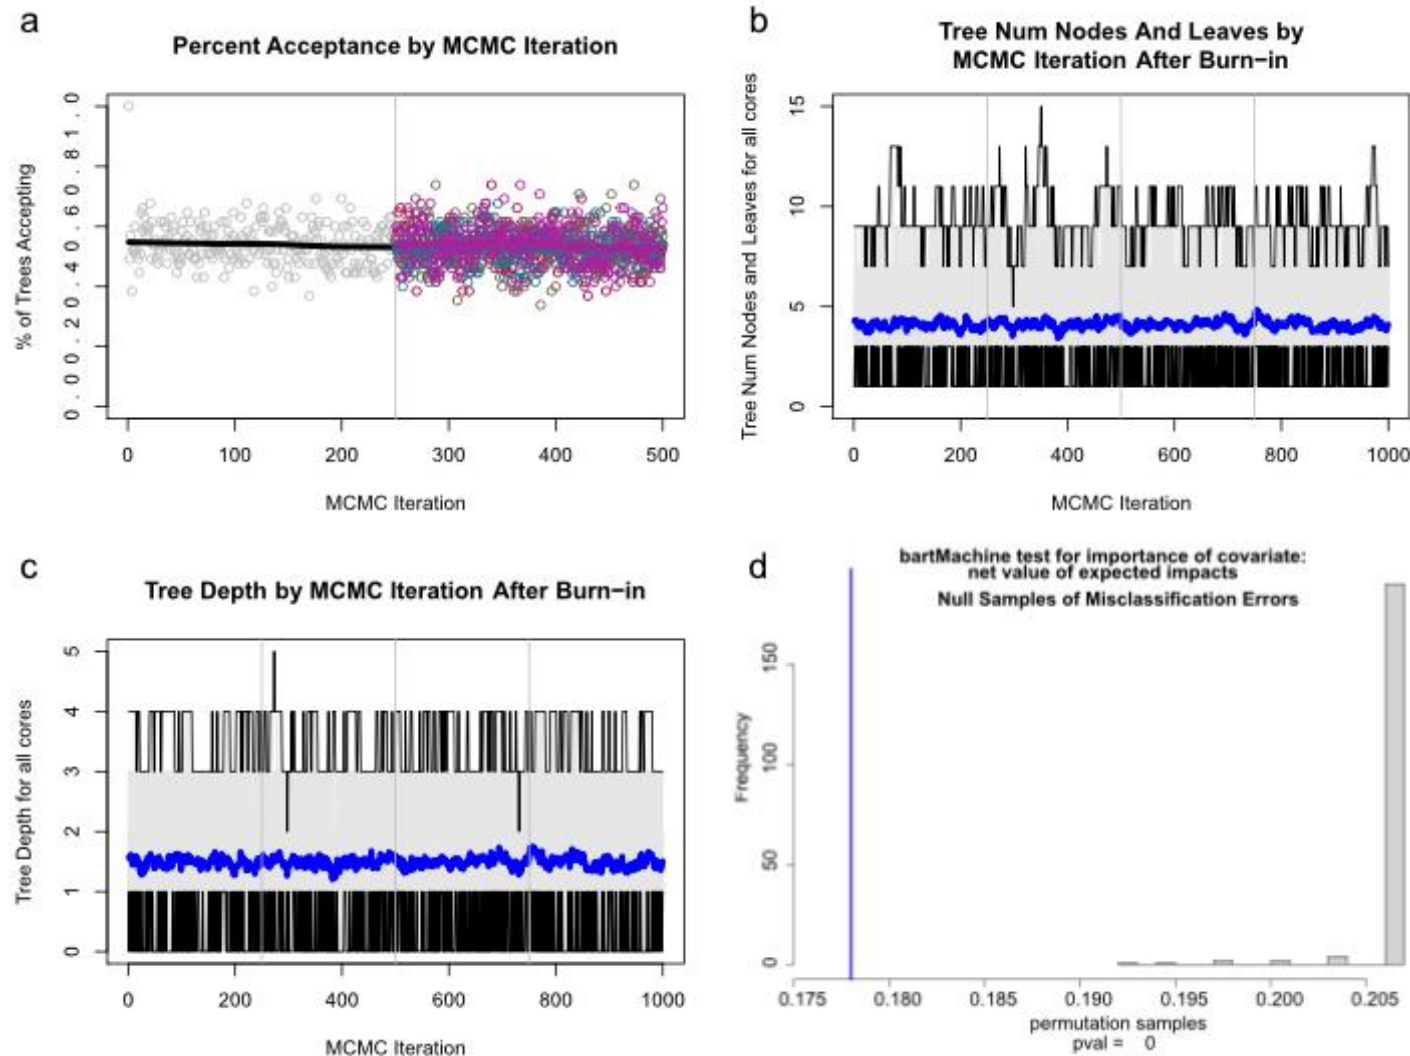

**Figure S2.** Convergence diagnostics and test of covariate importance for a BART model of the probability of having decided in favour of mitigation (taken as the equivalent of the expected utility value of mitigation). Percent Metropolis-Hastings proposals accepted across the 65 trees with one point per iteration (a); average number of leaves across the trees by iteration (b); average tree depth across the trees used by iteration (c); test results for the importance of the covariate net value of expected impacts (d). The grey vertical line separates burn-in iterations and post-burn-in iterations and colours of dots illustrate the different computing cores used (a). The p-value is the fraction of permutation-sampled total misclassification errors less than the observed total misclassification error (d).

**Table S1.** Responses to survey questions by response level split between those who have/have not decided in favour of adaptation and mitigation of climate change, respectively (Q7 and Q8 in Table 1).

| Number | Question                                                                                                                                                                                                             | Response option                                                                     | Has decided in favour of adaptation (n=70)<br>0.21 [0.17, 0.25] | Has not decided in favour of adaptation (n=268)<br>0.79 [0.76, 0.83] | Significant difference in estimated relative proportion of having decided in favour of adaptation - not having decided in favour of adaptation per response option and 90% CI | Has decided in favour of mitigation (n=268)<br>0.79 [0.75, 0.83] | Has not decided in favour of mitigation (n=70)<br>0.21 [0.17, 0.24] | Significant difference in estimated relative proportion of having decided in favour of mitigation - not having decided in favour of mitigation per response option and 90% CI |
|--------|----------------------------------------------------------------------------------------------------------------------------------------------------------------------------------------------------------------------|-------------------------------------------------------------------------------------|-----------------------------------------------------------------|----------------------------------------------------------------------|-------------------------------------------------------------------------------------------------------------------------------------------------------------------------------|------------------------------------------------------------------|---------------------------------------------------------------------|-------------------------------------------------------------------------------------------------------------------------------------------------------------------------------|
| 1      | Do you believe that the climate is changing because of human causes to the extent that it will affect you and/or your environment negatively?                                                                        | Yes, definitely<br>Yes, probably<br>I do not know<br>Probably not<br>Definitely not | 57<br>9<br>4<br>0<br>0                                          | 196<br>56<br>7<br>8<br>1                                             | -<br>-<br>-<br>-<br>-                                                                                                                                                         | 214<br>45<br>6<br>3<br>0                                         | 39<br>20<br>5<br>5<br>1                                             | 0.24 [0.14, 0.35]<br>-0.12 [-0.21, -0.024]<br>-0.05 [-0.11, -0.004]<br>-0.07 [-0.12, -0.016]<br>-                                                                             |
| 2      | Do you believe that the climate is changing because of human causes to the extent that it will affect you and/or your environment positively?                                                                        | Yes, definitely<br>Yes, probably<br>I do not know<br>Probably not<br>Definitely not | 11<br>6<br>10<br>26<br>17                                       | 34<br>36<br>22<br>123<br>53                                          | -<br>-<br>-<br>-<br>-                                                                                                                                                         | 36<br>31<br>22<br>121<br>58                                      | 9<br>11<br>10<br>28<br>12                                           | -<br>-<br>-<br>-<br>-                                                                                                                                                         |
| 3      | Have you yourself experienced that sudden extreme situations or gradual changes have occurred in the municipality that you interpret as caused by long-term and global climate change and that has negative impacts? | Yes, definitely<br>Yes, probably<br>I do not know<br>Probably not<br>Definitely not | 23<br>25<br>16<br>6<br>0                                        | 51<br>95<br>82<br>32<br>8                                            | 0.14 [0.044, 0.24]<br>-<br>-<br>-<br>-                                                                                                                                        | 68<br>100<br>74<br>22<br>4                                       | 6<br>20<br>90<br>16<br>4                                            | 0.16 [0.088, 0.23]<br>-<br>-<br>-0.15 [-0.24, -0.066]<br>-0.050 [-0.10, -0.0029]                                                                                              |
| 4      | Have you yourself experienced that sudden                                                                                                                                                                            | Yes, definitely<br>Yes, probably                                                    | 5<br>9                                                          | 7<br>29                                                              | -<br>-                                                                                                                                                                        | 36<br>31                                                         | 9<br>11                                                             | -<br>-                                                                                                                                                                        |

|   |                                                                                                                                                                            |                                                                           |                           |                              |                                            |                             |                           |                                                                                                                      |
|---|----------------------------------------------------------------------------------------------------------------------------------------------------------------------------|---------------------------------------------------------------------------|---------------------------|------------------------------|--------------------------------------------|-----------------------------|---------------------------|----------------------------------------------------------------------------------------------------------------------|
|   | extreme situations or gradual changes have occurred in the municipality that you interpret as caused by long-term and global climate change and that has positive impacts? | I do not know<br>Probably not<br>Definitely not                           | 22<br>25<br>9             | 95<br>88<br>49               | -<br>-<br>-                                | 22<br>121<br>58             | 10<br>28<br>12            | -<br>-<br>-                                                                                                          |
| 5 | Do you expect that long-term and global climate changes will lead to negative impacts in Malmö on:                                                                         |                                                                           |                           |                              |                                            |                             |                           |                                                                                                                      |
| a | Transport                                                                                                                                                                  | Yes, always<br>Often<br>Rarely<br>No, never<br>I do not know <sup>b</sup> | 15<br>24<br>15<br>2<br>14 | 41<br>107<br>40<br>17<br>63  | -<br>-<br>-<br>-<br>-                      | 42<br>104<br>43<br>14<br>65 | 14<br>27<br>12<br>5<br>12 | -<br>-<br>-<br>-<br>-                                                                                                |
| b | Beaches                                                                                                                                                                    | Yes, always<br>Often<br>Rarely<br>No, never<br>I do not know <sup>b</sup> | 27<br>29<br>10<br>2<br>2  | 93<br>102<br>39<br>9<br>25   | -<br>-<br>-<br>-<br>-0.06 [-0.10, -0.0079] | 106<br>113<br>29<br>5<br>15 | 14<br>18<br>20<br>6<br>12 | 0.19 [0.098, 0.28]<br>0.16 [0.060, 0.26]<br>-0.18 [-0.27, -0.085]<br>-0.070 [-0.13, -0.018]<br>-0.12 [-0.20, -0.043] |
| c | The coast                                                                                                                                                                  | Yes, always<br>Often<br>Rarely<br>No, never<br>I do not know <sup>b</sup> | 30<br>26<br>9<br>1<br>4   | 101<br>101<br>29<br>10<br>27 | -<br>-<br>-<br>-<br>-0.060 [-0.11, -0.015] | 116<br>107<br>25<br>4<br>16 | 15<br>20<br>13<br>7<br>15 | 0.21 [0.12, 0.31]<br>0.11 [0.0072, 0.21]<br>-0.10 [-0.18, -0.016]<br>-0.090 [-0.15, -0.030]<br>-0.17 [-0.26, -0.092] |
| d | The value of my property                                                                                                                                                   | Yes, always<br>Often<br>Rarely<br>No, never<br>I do not know <sup>b</sup> | 4<br>12<br>23<br>12<br>19 | 18<br>37<br>67<br>46<br>100  | -<br>-<br>-<br>-<br>-                      | 19<br>40<br>71<br>46<br>92  | 3<br>9<br>19<br>12<br>27  | -<br>-<br>-<br>-<br>-                                                                                                |
| e | The value of others' property                                                                                                                                              | Yes, always<br>Often<br>Rarely                                            | 7<br>24<br>19             | 24<br>71<br>67               | -<br>-<br>-                                | 27<br>85<br>64              | 4<br>10<br>22             | -<br>0.17 [0.082, 0.25]<br>-                                                                                         |

|   |                                       |                                                                           |                           |                              |                                                             |                             |                            |                                                                                                    |
|---|---------------------------------------|---------------------------------------------------------------------------|---------------------------|------------------------------|-------------------------------------------------------------|-----------------------------|----------------------------|----------------------------------------------------------------------------------------------------|
|   |                                       | No, never<br>I do not know <sup>b</sup>                                   | 1<br>19                   | 14<br>92                     | -<br>-                                                      | 9<br>83                     | 6<br>28                    | -0.060 [-0.12, -0.0013]<br>-                                                                       |
| f | Damage to my property                 | Yes, always<br>Often<br>Rarely<br>No, never<br>I do not know <sup>b</sup> | 9<br>16<br>21<br>9<br>15  | 20<br>50<br>81<br>40<br>77   | -<br>-<br>-<br>-<br>-                                       | 25<br>54<br>82<br>37<br>70  | 4<br>12<br>20<br>12<br>22  | -<br>-<br>-<br>-<br>-                                                                              |
| g | Damage to others' property            | Yes, always<br>Often<br>Rarely<br>No, never<br>I do not know <sup>b</sup> | 11<br>23<br>20<br>1<br>15 | 25<br>90<br>75<br>16<br>62   | -<br>-<br>-<br>-<br>-                                       | 32<br>98<br>74<br>7<br>57   | 4<br>15<br>21<br>10<br>20  | -<br>0.15 [0.054, 0.24]<br>-<br>-0.12 [-0.19, -0.052]<br>-                                         |
| h | Nature/fauna/flora                    | Yes, always<br>Often<br>Rarely<br>No, never<br>I do not know <sup>b</sup> | 31<br>28<br>8<br>1<br>2   | 105<br>110<br>21<br>12<br>20 | -<br>-<br>-<br>-<br>-                                       | 123<br>112<br>18<br>4<br>11 | 13<br>26<br>11<br>9<br>11  | 0.27 [0.17, 0.36]<br>-<br>-0.090 [-0.17, -0.020]<br>-0.12 [-0.18, -0.052]<br>-0.12 [-0.20, -0.048] |
| i | Spread of alien species               | Yes, always<br>Often<br>Rarely<br>No, never<br>I do not know <sup>b</sup> | 22<br>22<br>12<br>1<br>13 | 66<br>94<br>36<br>13<br>59   | -<br>-<br>-<br>-<br>-                                       | 79<br>95<br>35<br>6<br>53   | 9<br>21<br>13<br>8<br>19   | 0.16 [0.076, 0.24]<br>-<br>-<br>-0.10 [-0.16, -0.034]<br>-                                         |
| j | Permanent inundation of coastal areas | Yes, always<br>Often<br>Rarely<br>No, never<br>I do not know <sup>b</sup> | 20<br>27<br>16<br>0<br>7  | 77<br>93<br>44<br>14<br>40   | -<br>-<br>-<br>-0.040 [-0.074, -0.011]<br>-                 | 85<br>104<br>44<br>6<br>29  | 12<br>16<br>16<br>8<br>18  | 0.14 [0.053, 0.23]<br>0.15 [0.058, 0.25]<br>-<br>-0.10 [-0.16, -0.034]<br>-0.15 [-0.24, -0.060]    |
| k | Opportunities for outdoor swimming    | Yes, always<br>Often<br>Rarely<br>No, never<br>I do not know <sup>b</sup> | 14<br>20<br>27<br>1<br>8  | 51<br>86<br>58<br>28<br>45   | -<br>-<br>0.17 [0.067, 0.27]<br>-0.080 [-0.12, -0.036]<br>- | 55<br>90<br>70<br>15<br>38  | 10<br>16<br>15<br>14<br>15 | -<br>0.10 [0.0081, 0.20]<br>-<br>-0.15 [-0.23, -0.067]<br>-                                        |
| l | The temperature climate               | Yes, always<br>Often<br>Rarely                                            | 27<br>33<br>6             | 93<br>113<br>20              | -<br>-<br>-                                                 | 110<br>119<br>15            | 10<br>27<br>11             | 0.26 [0.17, 0.34]<br>-<br>-0.10 [-0.18, -0.032]                                                    |

|   |                               |                                                                           |                           |                             |                                                                                  |                             |                           |                                                                                                 |
|---|-------------------------------|---------------------------------------------------------------------------|---------------------------|-----------------------------|----------------------------------------------------------------------------------|-----------------------------|---------------------------|-------------------------------------------------------------------------------------------------|
|   |                               | No, never<br>I do not know <sup>b</sup>                                   | 2<br>2                    | 16<br>26                    | -<br>-0.060 [-0.11, -0.011]                                                      | 9<br>15                     | 9<br>13                   | -0.10 [-0.17, -0.033]<br>-0.13 [-0.21, -0.053]                                                  |
| m | Insects indoors               | Yes, always<br>Often<br>Rarely<br>No, never<br>I do not know <sup>b</sup> | 11<br>21<br>19<br>1<br>18 | 33<br>61<br>43<br>29<br>102 | -<br>-<br>0.11 [0.020, 0.21]<br>-0.080 [-0.13, -0.040]<br>-0.12 [-0.22, -0.021]  | 38<br>64<br>51<br>17<br>98  | 6<br>18<br>11<br>13<br>22 | -<br>-<br>-<br>-0.13 [-0.21, -0.049]<br>-                                                       |
| n | Health                        | Yes, always<br>Often<br>Rarely<br>No, never<br>I do not know <sup>b</sup> | 14<br>36<br>16<br>0<br>4  | 50<br>104<br>50<br>18<br>46 | -<br>0.12 [0.014, 0.23]<br>-<br>-0.060 [-0.091, -0.024]<br>-0.11 [-0.17, -0.043] | 55<br>118<br>54<br>8<br>33  | 9<br>22<br>12<br>10<br>17 | -<br>0.12 [0.018, 0.22]<br>-<br>-0.12 [-0.19, -0.047]<br>-0.12 [-0.21, -0.034]                  |
| o | Expenses for the municipality | Yes, always<br>Often<br>Rarely<br>No, never<br>I do not know <sup>b</sup> | 33<br>23<br>8<br>2<br>4   | 98<br>107<br>23<br>8<br>32  | -<br>-<br>-<br>-<br>-                                                            | 112<br>113<br>21<br>4<br>18 | 19<br>17<br>10<br>6<br>18 | 0.14 [0.041, 0.24]<br>0.17 [0.075, 0.27]<br>-<br>-0.070 [-0.13, -0.021]<br>-0.19 [-0.28, -0.10] |
| p | Heating                       | Yes, always<br>Often<br>Rarely<br>No, never<br>I do not know <sup>b</sup> | 16<br>26<br>17<br>1<br>10 | 55<br>83<br>54<br>25<br>51  | -<br>-<br>-<br>-0.070 [-0.11, -0.027]<br>-                                       | 65<br>89<br>57<br>16<br>41  | 6<br>20<br>14<br>10<br>20 | 0.15 [0.077, 0.22]<br>-<br>-<br>-0.090 [-0.16, -0.015]<br>-0.13 [-0.23, 0.042]                  |
| q | Taxes                         | Yes, always<br>Often<br>Rarely<br>No, never<br>I do not know <sup>b</sup> | 20<br>21<br>13<br>0<br>16 | 54<br>83<br>35<br>13<br>83  | -<br>-<br>-<br>-0.040 [-0.070, -0.0074]<br>-                                     | 60<br>88<br>40<br>5<br>75   | 14<br>16<br>8<br>8<br>24  | -<br>0.10 [0.00083, 0.19]<br>-<br>-0.10 [-0.17, -0.039]<br>-                                    |
| r | Winter sports                 | Yes, always<br>Often<br>Rarely<br>No, never<br>I do not know <sup>b</sup> | 15<br>27<br>6<br>6<br>16  | 58<br>93<br>37<br>28<br>52  | -<br>-<br>-<br>-<br>-                                                            | 69<br>97<br>31<br>21<br>50  | 4<br>23<br>12<br>13<br>18 | 0.19 [0.13, 0.26]<br>-<br>-<br>-0.11 [-0.19, -0.031]<br>-                                       |
| s | Agriculture                   | Yes, always<br>Often<br>Rarely                                            | 23<br>30<br>10            | 94<br>103<br>21             | -<br>-<br>-                                                                      | 107<br>114<br>20            | 10<br>19<br>11            | 0.25 [0.16, 0.33]<br>0.15 [0.052, 0.25]<br>-0.09 [-0.16, -0.012]                                |

|   |                                                                                               |                                                                           |                           |                             |                                            |                             |                           |                                                                               |
|---|-----------------------------------------------------------------------------------------------|---------------------------------------------------------------------------|---------------------------|-----------------------------|--------------------------------------------|-----------------------------|---------------------------|-------------------------------------------------------------------------------|
|   |                                                                                               | No, never<br>I do not know <sup>b</sup>                                   | 2<br>5                    | 15<br>35                    | -<br>-                                     | 4<br>23                     | 13<br>17                  | -0.17 [-0.25, -0.099]<br>-0.16 [-0.25, -0.073]                                |
| t | Tourism                                                                                       | Yes, always<br>Often<br>Rarely<br>No, never<br>I do not know <sup>b</sup> | 13<br>19<br>19<br>5<br>14 | 31<br>70<br>63<br>22<br>82  | -<br>-<br>-<br>-<br>-0.10 [-0.19, -0.0095] | 38<br>72<br>66<br>18<br>74  | 6<br>17<br>16<br>9<br>22  | -<br>-<br>-<br>-<br>-                                                         |
| u | Drinking water                                                                                | Yes, always<br>Often<br>Rarely<br>No, never<br>I do not know <sup>b</sup> | 18<br>28<br>15<br>1<br>8  | 72<br>86<br>36<br>14<br>60  | -<br>-<br>-<br>-<br>-0.10 [-0.18, -0.025]  | 82<br>92<br>41<br>5<br>48   | 8<br>22<br>10<br>10<br>20 | 0.18 [0.11, 0.26]<br>-<br>-<br>-0.13 [-0.20, -0.061]<br>-0.11 [-0.2, -0.013]  |
| v | The precipitation climate                                                                     | Yes, always<br>Often<br>Rarely<br>No, never<br>I do not know <sup>b</sup> | 25<br>32<br>7<br>1<br>5   | 90<br>101<br>25<br>13<br>39 | -<br>-<br>-<br>-<br>-0.07 [-0.13, -0.0033] | 108<br>105<br>22<br>5<br>28 | 7<br>28<br>10<br>9<br>16  | 0.29 [0.22, 0.37]<br>-<br>-<br>-0.11 [-0.18, -0.047]<br>-0.13 [-0.22, -0.044] |
| x | The wind climate                                                                              | Yes, always<br>Often<br>Rarely<br>No, never<br>I do not know <sup>b</sup> | 24<br>30<br>8<br>2<br>6   | 76<br>99<br>26<br>9<br>58   | -<br>-<br>-<br>-<br>-0.12 [-0.19, -0.052]  | 96<br>101<br>24<br>4<br>43  | 4<br>28<br>10<br>7<br>21  | 0.29 [0.22, 0.36]<br>-<br>-<br>-0.09 [-0.15, -0.03]<br>-0.14 [-0.24, -0.043]  |
| 6 | Do you expect long-term and global climate changes will lead to positive impacts in Malmö on: |                                                                           |                           |                             |                                            |                             |                           |                                                                               |
| a | Transports                                                                                    | Yes, always<br>Often<br>Rarely<br>No, never<br>I do not know <sup>b</sup> | 0<br>2<br>21<br>25<br>22  | 7<br>17<br>53<br>116<br>75  | -<br>-<br>0.10 [0.0072, 0.20]<br>-<br>-    | 4<br>16<br>56<br>116<br>76  | 3<br>3<br>18<br>25<br>21  | -<br>-<br>-<br>-<br>-                                                         |
| b | Beaches                                                                                       | Yes, always<br>Often<br>Rarely                                            | 1<br>10<br>23             | 7<br>14<br>64               | -<br>0.090 [0.023, 0.17]<br>-              | 4<br>18<br>71               | 4<br>6<br>16              | -0.05 [-0.10, -0.0029]<br>-<br>-                                              |

|   |                               |                                                                           |                          |                            |                                          |                            |                          |                                                                                |
|---|-------------------------------|---------------------------------------------------------------------------|--------------------------|----------------------------|------------------------------------------|----------------------------|--------------------------|--------------------------------------------------------------------------------|
|   |                               | No, never<br>I do not know <sup>b</sup>                                   | 29<br>7                  | 139<br>44                  | -<br>-                                   | 143<br>32                  | 25<br>19                 | 0.17 [0.071, 0.28]<br>-0.15 [-0.24, -0.061]                                    |
| c | The coast                     | Yes, always<br>Often<br>Rarely<br>No, never<br>I do not know <sup>b</sup> | 0<br>7<br>19<br>36<br>8  | 4<br>10<br>63<br>141<br>50 | -<br>0.070 [0.0073, 0.13]<br>-<br>-<br>- | 2<br>10<br>64<br>154<br>38 | 2<br>7<br>18<br>23<br>20 | -<br>-0.21 [-0.29, -0.12]<br>-<br>0.24 [0.14, 0.35]<br>-0.15 [-0.24, -0.051]   |
| d | The value of my property      | Yes, always<br>Often<br>Rarely<br>No, never<br>I do not know <sup>b</sup> | 0<br>3<br>19<br>25<br>23 | 2<br>9<br>45<br>110<br>102 | -<br>-<br>0.11 [0.013, 0.21]<br>-<br>-   | 1<br>7<br>49<br>110<br>101 | 1<br>5<br>15<br>25<br>24 | -<br>-<br>-<br>-<br>-                                                          |
| e | The value of others' property | Yes, always<br>Often<br>Rarely<br>No, never<br>I do not know <sup>b</sup> | 0<br>5<br>19<br>22<br>24 | 4<br>11<br>51<br>98<br>104 | -<br>-<br>-<br>-<br>-                    | 2<br>11<br>56<br>96<br>103 | 2<br>5<br>14<br>24<br>25 | -<br>-<br>-<br>-<br>-                                                          |
| f | Damage to my property         | Yes, always<br>Often<br>Rarely<br>No, never<br>I do not know <sup>b</sup> | 1<br>1<br>18<br>29<br>21 | 2<br>5<br>34<br>135<br>92  | -<br>-<br>0.13 [0.097, 0.16]<br>-<br>-   | 1<br>1<br>38<br>138<br>90  | 2<br>5<br>14<br>26<br>23 | -<br>-0.07 [-0.13, -0.022]<br>-<br>0.14 [0.035, 0.25]<br>-                     |
| g | Damage to others' property    | Yes, always<br>Often<br>Rarely<br>No, never<br>I do not know <sup>b</sup> | 1<br>3<br>16<br>29<br>21 | 5<br>5<br>38<br>124<br>96  | -<br>-<br>0.090 [0.0045, 0.18]<br>-<br>- | 3<br>3<br>39<br>131<br>92  | 3<br>5<br>15<br>22<br>25 | -<br>-0.07 [-0.12, -0.016]<br>-<br>0.17 [0.069, 0.27]<br>-                     |
| h | Nature/fauna/flora            | Yes, always<br>Often<br>Rarely<br>No, never<br>I do not know <sup>b</sup> | 0<br>7<br>28<br>26<br>9  | 8<br>18<br>62<br>129<br>51 | -<br>-<br>0.17 [0.068, 0.27]<br>-<br>-   | 3<br>18<br>73<br>133<br>41 | 5<br>7<br>17<br>22<br>19 | -0.07 [-0.12, -0.016]<br>-<br>-<br>0.18 [0.077, 0.28]<br>-0.12 [-0.22, -0.029] |
| i | Spread of alien species       | Yes, always<br>Often<br>Rarely                                            | 0<br>6<br>21             | 4<br>26<br>45              | -<br>-<br>0.13 [0.035, 0.23]             | 2<br>26<br>51              | 2<br>6<br>15             | -<br>-<br>-                                                                    |

|   |                                          |                                                                           |                          |                            |                                                             |                            |                           |                                                                                                   |
|---|------------------------------------------|---------------------------------------------------------------------------|--------------------------|----------------------------|-------------------------------------------------------------|----------------------------|---------------------------|---------------------------------------------------------------------------------------------------|
|   |                                          | No, never<br>I do not know <sup>b</sup>                                   | 27<br>16                 | 118<br>75                  | -<br>-                                                      | 122<br>67                  | 23<br>24                  | 0.12 [0.020, 0.23]<br>-                                                                           |
| j | Permanent inundation<br>of coastal areas | Yes, always<br>Often<br>Rarely<br>No, never<br>I do not know <sup>b</sup> | 0<br>5<br>14<br>34<br>17 | 5<br>9<br>35<br>160<br>59  | -<br>-<br>-<br>-0.11 [-0.22, -0.0044]<br>-                  | 3<br>9<br>38<br>161<br>57  | 2<br>5<br>11<br>33<br>19  | -<br>-<br>-<br>0.13 [0.02, 0.24]<br>-                                                             |
| k | Opportunities for<br>outdoor swimming    | Yes, always<br>Often<br>Rarely<br>No, never<br>I do not know <sup>b</sup> | 1<br>9<br>20<br>28<br>12 | 8<br>31<br>57<br>102<br>70 | -<br>-<br>-<br>-<br>-                                       | 6<br>31<br>64<br>108<br>59 | 3<br>9<br>13<br>22<br>23  | -<br>-<br>-<br>-<br>-0.11 [-0.21, -0.011]                                                         |
| l | The temperature climate                  | Yes, always<br>Often<br>Rarely<br>No, never<br>I do not know <sup>b</sup> | 3<br>15<br>15<br>29<br>8 | 7<br>30<br>82<br>103<br>46 | -<br>0.10 [0.017, 0.19]<br>-<br>-<br>-                      | 7<br>35<br>80<br>108<br>38 | 3<br>10<br>17<br>24<br>16 | -<br>-<br>-<br>-<br>-0.09 [-0.18, -0.0031]                                                        |
| m | Insects indoors                          | Yes, always<br>Often<br>Rarely<br>No, never<br>I do not know <sup>b</sup> | 0<br>6<br>10<br>34<br>20 | 4<br>4<br>33<br>110<br>117 | -<br>0.080 [0.022, 0.14]<br>-<br>-<br>-0.15 [-0.25, -0.046] | 1<br>9<br>31<br>123<br>104 | 3<br>1<br>12<br>21<br>33  | -0.04 [-0.089, -0.0056]<br>-<br>-<br>0.15 [0.050, 0.25]<br>-                                      |
| n | Health                                   | Yes, always<br>Often<br>Rarely<br>No, never<br>I do not know <sup>b</sup> | 1<br>5<br>19<br>32<br>13 | 7<br>14<br>53<br>121<br>73 | -<br>-<br>-<br>-<br>-                                       | 4<br>16<br>59<br>129<br>60 | 4<br>3<br>13<br>24<br>26  | -0.05 [-0.10, -0.0029]<br>-<br>-<br>0.14 [0.032, 0.24]<br>-0.15 [-0.25, -0.044]                   |
| o | Expenses for the<br>municipality         | Yes, always<br>Often<br>Rarely<br>No, never<br>I do not know <sup>b</sup> | 2<br>4<br>19<br>34<br>11 | 8<br>7<br>50<br>129<br>74  | -<br>-<br>-<br>-<br>-0.11 [-0.20, -0.029]                   | 5<br>6<br>56<br>144<br>57  | 5<br>5<br>13<br>19<br>28  | -0.06 [-0.11, -0.007]<br>-0.05 [-0.11, -0.004]<br>-<br>0.26 [0.16, 0.36]<br>-0.19 [-0.29, -0.085] |
| p | Heating                                  | Yes, always<br>Often<br>Rarely                                            | 2<br>8<br>15             | 11<br>26<br>60             | -<br>-<br>-                                                 | 8<br>31<br>59              | 5<br>3<br>16              | -<br>0.06 [0.0083, 0.12]<br>-                                                                     |

|   |                           |                                                                           |                           |                             |                                                             |                            |                          |                                                                               |
|---|---------------------------|---------------------------------------------------------------------------|---------------------------|-----------------------------|-------------------------------------------------------------|----------------------------|--------------------------|-------------------------------------------------------------------------------|
|   |                           | No, never<br>I do not know <sup>b</sup>                                   | 27<br>18                  | 100<br>71                   | -<br>-                                                      | 108<br>62                  | 19<br>27                 | 0.13 [0.029, 0.23]<br>-0.16 [-0.26, -0.052]                                   |
| q | Taxes                     | Yes, always<br>Often<br>Rarely<br>No, never<br>I do not know <sup>b</sup> | 2<br>2<br>12<br>34<br>20  | 10<br>10<br>37<br>122<br>89 | -<br>-<br>-<br>-<br>-                                       | 3<br>8<br>41<br>137<br>79  | 9<br>4<br>8<br>19<br>30  | -0.12 [-0.19, -0.056]<br>-<br>-<br>0.24 [0.13, 0.33]<br>-0.13 [-0.24, -0.028] |
| r | Winter sports             | Yes, always<br>Often<br>Rarely<br>No, never<br>I do not know <sup>b</sup> | 3<br>5<br>14<br>31<br>17  | 4<br>17<br>50<br>135<br>62  | -<br>-<br>-<br>-<br>-                                       | 4<br>19<br>42<br>147<br>56 | 3<br>3<br>22<br>19<br>23 | -<br>-<br>-0.16 [-0.26, -0.061]<br>0.27 [0.17, 0.37]<br>-0.12 [-0.22, -0.021] |
| s | Agriculture               | Yes, always<br>Often<br>Rarely<br>No, never<br>I do not know <sup>b</sup> | 3<br>11<br>15<br>28<br>13 | 6<br>26<br>72<br>107<br>57  | -<br>-<br>-<br>-<br>-                                       | 5<br>32<br>69<br>119<br>43 | 4<br>5<br>18<br>16<br>27 | -<br>-<br>-<br>0.21 [0.11, 0.30]<br>-0.23 [-0.33, -0.13]                      |
| t | Tourism                   | Yes, always<br>Often<br>Rarely<br>No, never<br>I do not know <sup>b</sup> | 1<br>16<br>17<br>21<br>15 | 9<br>31<br>58<br>84<br>86   | -<br>0.12 [0.030, 0.20]<br>-<br>-<br>-0.10 [-0.19, -0.0079] | 7<br>38<br>62<br>85<br>76  | 3<br>9<br>13<br>20<br>25 | -<br>-<br>-<br>-<br>-                                                         |
| u | Drinking water            | Yes, always<br>Often<br>Rarely<br>No, never<br>I do not know <sup>b</sup> | 1<br>3<br>21<br>25<br>20  | 6<br>10<br>51<br>127<br>74  | -<br>-<br>0.11 [0.017, 0.21]<br>-0.11 [-0.22, -0.0089]<br>- | 5<br>9<br>59<br>129<br>66  | 2<br>4<br>13<br>23<br>28 | -<br>-<br>-<br>0.15 [0.048, 0.25]<br>-0.15 [-0.26, -0.051]                    |
| v | The precipitation climate | Yes, always<br>Often<br>Rarely<br>No, never<br>I do not know <sup>b</sup> | 2<br>3<br>17<br>35<br>13  | 5<br>11<br>54<br>133<br>65  | -<br>-<br>-<br>-<br>-                                       | 4<br>12<br>55<br>146<br>51 | 3<br>2<br>16<br>22<br>27 | -<br>-<br>-<br>0.23 [0.12, 0.33]<br>-0.20 [-0.30, -0.095]                     |
| x | The wind climate          | Yes, always<br>Often<br>Rarely                                            | 1<br>3<br>18              | 6<br>12<br>51               | -<br>-<br>-                                                 | 4<br>13<br>55              | 3<br>2<br>14             | -<br>-<br>-                                                                   |

|  |  |                                         |          |           |        |           |          |                                             |
|--|--|-----------------------------------------|----------|-----------|--------|-----------|----------|---------------------------------------------|
|  |  | No, never<br>I do not know <sup>b</sup> | 32<br>16 | 123<br>76 | -<br>- | 133<br>63 | 22<br>29 | 0.18 [0.077, 0.28]<br>-0.18 [-0.28, -0.077] |
|--|--|-----------------------------------------|----------|-----------|--------|-----------|----------|---------------------------------------------|

**Table S2.** Model errors of univariate BART models of decisions in favour of adaptation to the impacts of climate change and mitigation of climate change. Each model is based on 250 burn-in and 1 000 posterior samples.

| BART model of decisions in favour of adaptation | Adaptation predicted | No adaptation predicted | Model errors |
|-------------------------------------------------|----------------------|-------------------------|--------------|
| Has adapted                                     | 48                   | 22                      | 0.314        |
| Has not adapted                                 | 98                   | 170                     | 0.366        |
|                                                 | 0.671                | 0.115                   | 0.355        |
|                                                 |                      |                         |              |
| BART model of decisions in favour of mitigation | Mitigation predicted | No mitigation predicted |              |
| Has mitigated                                   | 241                  | 27                      | 0.101        |
| Has not mitigated                               | 39                   | 31                      | 0.557        |
|                                                 | 0.139                | 0.466                   | 0.195        |
